# Supplementary material
Source: PubMed Central journal article supplement (PMC8579876)
Supplement: NIHMS1741250-supplement-Table_S1_.pdf [file NIHMS1741250-supplement-Table_S1_.pdf]

Supplementary Table S1. Summary of themes and example quotes from the patient/care partner interviews.

| Themes                                                                | Sub-Themes                              | Video Participants                                                                                                                                                                                                                                  |                                                                                                                                                                                                                                                                                                                                       | Telephone Participants                                                                                            |                                                                                                                 |
|-----------------------------------------------------------------------|-----------------------------------------|-----------------------------------------------------------------------------------------------------------------------------------------------------------------------------------------------------------------------------------------------------|---------------------------------------------------------------------------------------------------------------------------------------------------------------------------------------------------------------------------------------------------------------------------------------------------------------------------------------|-------------------------------------------------------------------------------------------------------------------|-----------------------------------------------------------------------------------------------------------------|
|                                                                       |                                         | Summary of Themes                                                                                                                                                                                                                                   | Example Quotes <sup>1</sup>                                                                                                                                                                                                                                                                                                           | Summary of Themes                                                                                                 | Example Quotes <sup>1</sup>                                                                                     |
| <b>Perceived value of delivery mode and preference for future use</b> | Positive experience                     | <ul style="list-style-type: none"> <li>• Convenient; saved travel time; accomplished same as going to the VA</li> <li>• Liked better than phone calls, easier to converse looking at someone, felt more connected to healthcare provider</li> </ul> | <ul style="list-style-type: none"> <li>• “I thought it was very convenient, easy to understand, and to get along with. Easier than going down to the VA.” (Veteran)</li> <li>• “It’s more secure to visually see someone you’re talking with, and comments and reactions. I like that. It’s very positive.” (Care partner)</li> </ul> | <ul style="list-style-type: none"> <li>• Prefer regular phone calls in future or talking face to face.</li> </ul> | <ul style="list-style-type: none"> <li>• “Just feel more comfortable on phone than video.” (Veteran)</li> </ul> |
|                                                                       | Negative experience                     | <ul style="list-style-type: none"> <li>• Did not work, unable to set up iPad, frustrating experience.</li> <li>• Prefer phone in future; easier than a tablet, feel more comfortable.</li> </ul>                                                    | <ul style="list-style-type: none"> <li>• “Had one call that kinda sorta worked. We’re not tech...It was aggravating and frustrating. We could see the nurse on the iPad, but things went downhill from there.” (Care partner)</li> </ul>                                                                                              | [No negative experiences noted]                                                                                   | [No negative experiences noted]                                                                                 |
|                                                                       | Relationship to comfort with technology | <ul style="list-style-type: none"> <li>• Participants who had experience with the relevant technology tended to enjoy the experience more.</li> </ul>                                                                                               | <ul style="list-style-type: none"> <li>• “It’s easy. No problems with it. We are on our computer, laptop and iPad about half the day.” (Veteran)</li> <li>• “We like video a lot better. We’re comfortable using the iPad already...we Skype with grandchildren and use FaceTime.” (Care partner)</li> </ul>                          | <ul style="list-style-type: none"> <li>• Phone calls are less complicated.</li> </ul>                             | <ul style="list-style-type: none"> <li>• “We’re not tech people.” (Veteran)</li> </ul>                          |
| <b>Usefulness for managing health</b>                                 |                                         | No major changes in management of chronic conditions, but increased                                                                                                                                                                                 | <ul style="list-style-type: none"> <li>• “I learned 1-2 things I didn’t know, especially about blood</li> </ul>                                                                                                                                                                                                                       | <ul style="list-style-type: none"> <li>• Some participants had trouble remembering</li> </ul>                     | <ul style="list-style-type: none"> <li>• “No health issues to talk about.” (Veteran)</li> </ul>                 |

|                                                 |  |                                                                                                                                                                                                        |                                                                                                                                                                                                                                                                                                          |                                               |                                                                                                                                                                                                                                              |
|-------------------------------------------------|--|--------------------------------------------------------------------------------------------------------------------------------------------------------------------------------------------------------|----------------------------------------------------------------------------------------------------------------------------------------------------------------------------------------------------------------------------------------------------------------------------------------------------------|-----------------------------------------------|----------------------------------------------------------------------------------------------------------------------------------------------------------------------------------------------------------------------------------------------|
|                                                 |  | awareness and reinforced known information. Medication and diabetes information was most helpful. Veterans appreciated the interaction with nurses and opportunity to discuss other health conditions. | pressure and how it affects the kidneys. Good refresher about blood sugar, insulin and mealtimes.” (Veteran)<br>• She explained things I didn’t know about medications... and Silver Sneakers.” <sup>2</sup> (Veteran)                                                                                   | the call content and if anything helped.      | • “Helped with medications.” (Veteran)                                                                                                                                                                                                       |
| <b>Satisfaction with call content</b>           |  | Satisfaction with the nurse interaction and the medical information that was covered; not much novel information, but helpful to get reminders                                                         | • “Think the calls were pretty good because it made me aware of medications I was not taking properly, the way I should’ve been... the calls brought it to my attention, enabled me to get them straightened out.” (Veteran)<br>• “It just helps to stay informed...if you can just remember.” (Veteran) | • Not memorable, but generally satisfied.     | • “Don’t mind doing it but to me was a waste of time... questions were repetitive...I don’t have problems.” (Veteran)<br>• “Probably very satisfied...to talk with someone about what’s wrong, what the problems are, is helpful.” (Veteran) |
| <b>Perception of Care Partner participation</b> |  | • Helpful to have Care Partner informed of medical issues; helped with reminders, and with setting up technology.                                                                                      | • “Wife is a big computer wiz and took care of all setting up...would be in trouble if wife was not there to set up.” (Veteran)<br>• “She speaks for me a lot. She knows what I do every day...she will correct me in a heartbeat.” (Veteran)                                                            | • Helped patient remember health information. | “She helps me remember stuff. I’m 80 years old so I can’t remember like I used to.” (Veteran)                                                                                                                                                |

<sup>1</sup> Quotes illustrating characteristic examples are derived from interview notes.

<sup>2</sup> A health and fitness program designed for adults 65+
